# Supplementary material
Source: publisher figshare collection journal article supplement (https://gsapubs.figshare.com/ndownloader/files/22408620)
Supplement: Supplementary file 1 [file 22408620]

Jones, C.H., Reeg, H., Zandt, G., Gilbert, H., Owens, T.J., and Stachnik, J., 2014, P-wave tomography of potential convective downwellings and their source regions, Sierra Nevada, California: Geosphere, v. 10, doi:10.1130/GES00961.1.

Supplemental Table 5. Events recorded and used in the inversion from the 1988 deployment.

| **year** | **jday** | **hour** | **min** | **second** | **latitude** | **longitude** | **depth** |
| --- | --- | --- | --- | --- | --- | --- | --- |
| 1988 | 170 | 18 | 42 | 3 | 13.583 | -91.12 | 60 |
| 1988 | 173 | 6 | 26 | 16 | 24.881 | -45.828 | 26 |
| 1988 | 176 | 8 | 57 | 53 | 10.229 | -60.604 | 53 |
| 1988 | 184 | 10 | 1 | 28 | -14.295 | 167.188 | 156 |
| 1988 | 186 | 13 | 54 | 14 | 17.655 | -71.713 | 33 |
| 1988 | 188 | 1 | 10 | 52 | -17.683 | -178.877 | 545 |
| 1988 | 188 | 15 | 54 | 19 | 41.772 | 144.326 | 44 |
| 1988 | 191 | 15 | 10 | 57 | -29.822 | -179.063 | 272 |
| 1988 | 194 | 17 | 59 | 12 | 10.362 | -62.366 | 33 |
| 1988 | 198 | 16 | 55 | 0 | -27.256 | -176.821 | 30 |
| 1988 | 204 | 21 | 16 | 4 | 39.932 | -29.594 | 10 |
| 1988 | 205 | 15 | 17 | 8 | -6.55 | 152.768 | 34 |
| 1988 | 209 | 16 | 58 | 17 | 18.583 | 145.604 | 217 |
| 1988 | 210 | 17 | 12 | 33 | -22.357 | -65.805 | 286 |
| 1988 | 210 | 22 | 36 | 25 | 29.347 | 142.16 | 40 |
| 1988 | 212 | 2 | 45 | 13 | -24.423 | -116.115 | 10 |
| 1988 | 212 | 5 | 52 | 6 | 31.32 | -41.113 | 20 |
| 1988 | 212 | 21 | 7 | 20 | 44.779 | 149.854 | 62 |
| 1988 | 217 | 6 | 18 | 42 | -42.693 | -85.895 | 10 |
| 1988 | 221 | 19 | 59 | 31 | 63.52 | 2.388 | 10 |
| 1988 | 223 | 4 | 38 | 26 | -10.213 | 160.77 | 38 |
| 1988 | 223 | 11 | 46 | 46 | -28.152 | -112.67 | 10 |
| 1988 | 223 | 13 | 11 | 19 | -14.882 | 167.3 | 134 |
| 1988 | 224 | 3 | 5 | 40 | 49.195 | -28.361 | 10 |
| 1988 | 227 | 10 | 56 | 57 | 54.613 | 152.677 | 645 |
| 1988 | 227 | 17 | 53 | 9 | -27.298 | -71.032 | 39 |
| 1988 | 229 | 10 | 1 | 9 | 51.206 | -178.199 | 33 |
| 1988 | 234 | 13 | 51 | 42 | -42.877 | -85.839 | 10 |
| 1988 | 240 | 7 | 4 | 38 | 31.013 | -64.867 | 10 |
| 1988 | 240 | 16 | 30 | 16 | -15.875 | -172.08 | 55 |
| 1988 | 246 | 10 | 27 | 48 | 53.986 | 161.535 | 48 |
| 1988 | 247 | 9 | 9 | 37 | -18.26 | -178.183 | 597 |
| 1988 | 247 | 12 | 3 | 53 | 16.812 | -61.097 | 60 |
| 1988 | 248 | 0 | 32 | 19 | 22.058 | 142.884 | 252 |
| 1988 | 249 | 6 | 13 | 17 | 18.42 | -70.403 | 27 |
| 1988 | 251 | 11 | 53 | 24 | 30.316 | 137.365 | 501 |
| 1988 | 253 | 23 | 7 | 47 | -7.085 | -81.425 | 36 |
| 1988 | 255 | 1 | 5 | 34 | 14.654 | -92.591 | 83 |
| 1988 | 255 | 11 | 33 | 13 | 50.397 | 155.179 | 115 |
| 1988 | 255 | 11 | 37 | 26 | 18.876 | 145.686 | 177 |
| 1988 | 258 | 3 | 59 | 57 | 49.82 | 78.798 | 0 |
| 1988 | 258 | 13 | 13 | 52 | 51.898 | -167.867 | 48 |
| 1988 | 258 | 20 | 36 | 38 | 18.559 | -102.255 | 80 |
| 1988 | 259 | 18 | 48 | 1 | -1.411 | -77.873 | 172 |
| 1988 | 260 | 2 | 16 | 18 | -20.469 | -178.445 | 570 |
| 1988 | 264 | 17 | 56 | 18 | 4.68 | -77.428 | 38 |
| 1988 | 265 | 9 | 58 | 53 | 46.158 | 152.194 | 27 |
| 1988 | 268 | 3 | 22 | 25 | 2.302 | -101.436 | 10 |
